# Supplementary material for: Whole exome sequencing analyses reveal gene–microbiota interactions in the context of IBD
Source: PubMed Central journal article supplement (PMC7815889; doi:10.1136/gutjnl-2019-319706), 2020-07-10

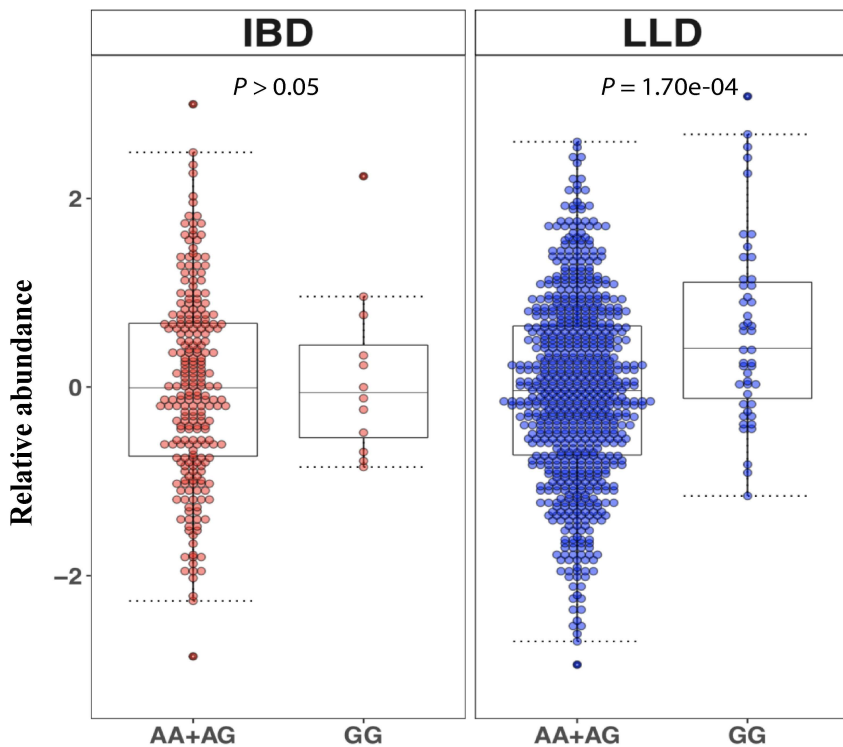

Supplement: gutjnl-2019-319706supp007.pdf [file gutjnl-2019-319706supp007.pdf]
